# Supplementary material
Source: PubMed Central journal article supplement (PMC6726438)
Supplement: NIHMS1046216-supplement-Table_1.pdf [file NIHMS1046216-supplement-Table_1.pdf]

**Supplemental Table S1. Strains used in this study.**

| <b>Strain</b> | <b>Genotype (*)</b>                                                                                                           | <b>Source</b>      |
|---------------|-------------------------------------------------------------------------------------------------------------------------------|--------------------|
| RLY7110       | <i>HSP104-GFP-HIS3</i>                                                                                                        | (Huh et al., 2003) |
| RLY8168       | <i>pRS426-ADH-OLII-HcRed; DNMI-GFP-HIS3</i>                                                                                   | This study         |
| RLY8169       | <i>HSP104-GFP-HIS3; trp:: DsRed-HDEL-NatMax</i>                                                                               | This study         |
| RLY8170       | <i>HSP104-GFP-HIS3; pRS426-ADH-OLII-HcRed</i>                                                                                 | This study         |
| RLY8171       | <i>HSP104-GFP-HIS3; trp:: DsRed-HDEL-NatMax; pYES-mito-BFP</i>                                                                | This study         |
| RLY8172       | <i>HSP104-GFP-HIS3; pESC-URA-Gal-mCherry-UBC9<sup>ts</sup></i>                                                                | This study         |
| RLY8173       | <i>trp::p404-GDP-OLII-HcRed-NatMax;MDM34-GFP-HIS3</i>                                                                         | This study         |
| RLY8174       | <i>Δfis1::KanMX; HSP104-GFP-HIS3; pRS426-ADH-OLII-HcRed</i>                                                                   | This study         |
| RLY8175       | <i>Δdnm1::KanMX; HSP104-GFP-HIS3; pRS426-ADH-OLII-HcRed</i>                                                                   | This study         |
| RLY8176       | <i>Δmdv1::KanMX; HSP104-GFP-HIS3; pRS426-ADH-OLII-HcRed</i>                                                                   | This study         |
| RLY8177       | <i>Δfis1::KanMX; HSP104-GFP-HIS3; trp::DsRed-HDEL-NatMax</i>                                                                  | This study         |
| RLY8178       | <i>pESC-URA-Gal-GFP-UBC9<sup>ts</sup></i>                                                                                     | This study         |
| RLY8179       | <i>Δrpl42a::NatMX; RPL42B<sup>P56Q</sup>-HIS3;HSP104-GFP-URA3</i>                                                             | This study         |
| RLY8180       | <i>MDM34-GFP-HIS; HSP104-mCherry-URA3</i>                                                                                     | This study         |
| RLY8181       | <i>DNMI-GFP-HIS; HSP104-mCherry-URA3</i>                                                                                      | This study         |
| RLY8182       | <i>TOM20-mCitrine-HIS3; trp::DsRed-HDEL-NatMa; HSP104-mTur-Ura3;</i>                                                          | This study         |
| RLY8183       | <i>trp::p404-GDP-GFP-Luciferase</i>                                                                                           | This study         |
| RLY8184       | <i>trp::p404-GDP-OLII-HcRed-NatMax; ABF2-GFP-HIS3</i>                                                                         | This study         |
| RLY8185       | <i>Δfis1::KanMX; HSP104-GFP-HIS3;</i>                                                                                         | This study         |
| RLY8186       | <i>hoΔ::PSCW11-cre-EBD78-NATMX; loxP-UBC9-loxP-LEU2; loxP-CDC20-Intron-loxP-HPHMX; HSP104-GFP-HIS3; pRS426-ADH-OLII-HcRed</i> | This study         |
| RLY8463       | <i>Δfis1::KanMX; HSP104-GFP-HIS3; trp::p404-GDP-OLII-HcRed-NatMax</i>                                                         | This study         |
| RLY8464       | <i>HSP104-GFP-HIS3; trp::p404-GDP-OLII-HcRed-NatMax</i>                                                                       | This study         |
| RLY8465       | <i>HSP104-GFP-HIS3; pRP1574(EDC3-mCherry-Ura3);</i>                                                                           | This study         |
| RLY8466       | <i>HSP104-GFP-HIS3; pRP1661(PUB1-mCherry-Ura3)</i>                                                                            | This study         |
| RLY8467       | <i>pRS316-ATG8-GFP; HSP104-mCherry-HIS3</i>                                                                                   | This study         |

|         |                                                                                                    |                         |
|---------|----------------------------------------------------------------------------------------------------|-------------------------|
| RLY8468 | <i>ERG11-GFP-HIS3</i>                                                                              | (Huh et al., 2003)      |
| RLY8469 | <i>trp::mCherry-Scs2TM-NatMX;Hsp104-GFP-His</i>                                                    | This study              |
| RLY8470 | <i>trp::mCherry-Fis1TM-KanMX;Hsp104-GFP-His</i>                                                    | This study              |
| RLY8471 | <i>leu2::AT1.03-LEU</i>                                                                            | This study              |
| RLY8472 | <i>leu2::AT1.03 R122K/R126K-LEU</i>                                                                | This study              |
| RLY2626 | <i>Mat A; ura3-52; his3-Δ200; trp1-1; leu2-3;</i>                                                  | Rancati et al.,<br>2008 |
| RLY8473 | <i>pESC-URA-Gal-GFP-UBC9<sup>ts</sup>; trp::DsRed-HDEL-NatMax</i>                                  | This study              |
| RLY8474 | <i>pESC-URA-Gal-GFP-UBC9<sup>ts</sup>; trp::p404-GDP-OL11-HcRed-NatMax;</i>                        | This study              |
| RLY8536 | <i>Δpdr5::KanMX; trp::DsRed-HDEL-NatMax;</i><br><i>pESC-URA-Gal-GFP-UBC9<sup>ts</sup></i>          | This study              |
| RLY8537 | <i>Δpdr5::KanMX; trp::p404-GDP-OL11-HcRed-NatMax;</i><br><i>pESC-URA-Gal-GFP-UBC9<sup>ts</sup></i> | This study              |

(\*) All strains used in this study are derivatives of the By4741 background (*MATa his3Δ1 leu2Δ0 met15Δ0 ura3Δ0*); RLY8169-8172, 8174-8177, 8185, 8463-8466 are derivatives of RLY7110; RLY8471-8472 was derived from RLY2626.
